# Supplementary material
Source: PubMed Central journal article supplement (PMC2443662)
Supplement: M802914200_1.pdf [file M802914200_1.pdf]

**SUPPLEMENTARY**

**FIGURE 1. Anaerobic equilibrium photoreduction of eNOSr protein.** Visible spectra were obtained during the photoreduction of eNOSr in the absence of NADP<sup>+</sup> with normalization at 700 nm. Panel A contains spectra that preceded the spectra in panel B. Arrows indicate direction of absorbance change.

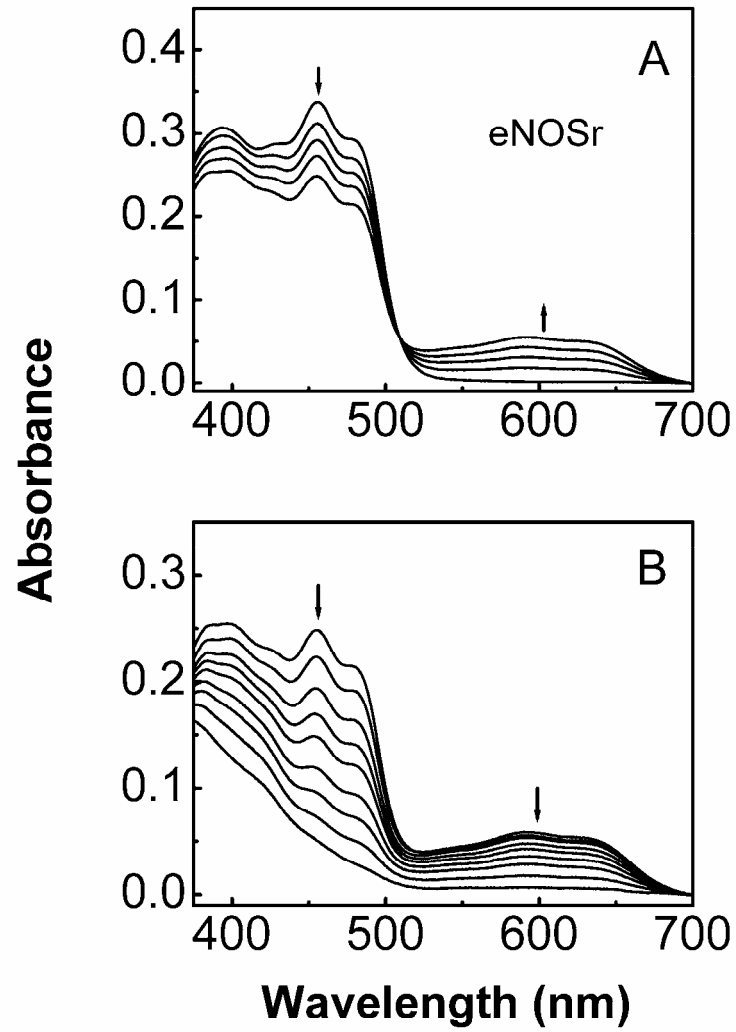

**SUPPLEMENTARY****Table 1. Summary of results from reactions of mixing NOSr proteins with excess cytochrome c**

An excess of cytochrome c was mixed with NOSr proteins starting either as their fully-reduced or one-electron reduced form in a stopped-flow instrument at 10 °C. Values are derived from data in Figures 7 & 8. NA is not applicable.

| Protein                    | Condition | Calculated Activity (min <sup>-1</sup> ) | Time for 1 <sup>st</sup> turnover (s) | % fast phase in 1 <sup>st</sup> turnover |
|----------------------------|-----------|------------------------------------------|---------------------------------------|------------------------------------------|
| eNOSr (FMNH <sub>2</sub> ) | - CaM     | 29                                       | 1.8                                   | 20                                       |
|                            | + CaM     | 72                                       | 0.1                                   | 90-100                                   |
| eNOSr (FMNsq)              | - CaM     | 27                                       | 2.1                                   | NA                                       |
|                            | + CaM     | 50                                       | 1.2                                   | NA                                       |
| nNOSr (FMNH <sub>2</sub> ) | - CaM     | 489                                      | 0.03                                  | 50-75                                    |
|                            | + CaM     | 1261                                     | dead time                             | 100                                      |
| nNOSr (FMNsq)              | - CaM     | 276                                      | 0.21                                  | NA                                       |
|                            | + CaM     | 829                                      | 0.09                                  | NA                                       |
